# Supplementary material
Source: Springer Nature journal article supplement (https://www.springermedizin.de/resource/supplementary/12931_2011_1131_MOESM9_ESM.pdf/9425382)

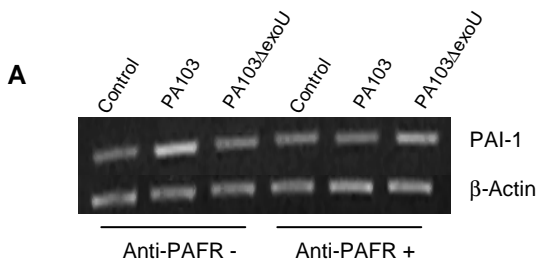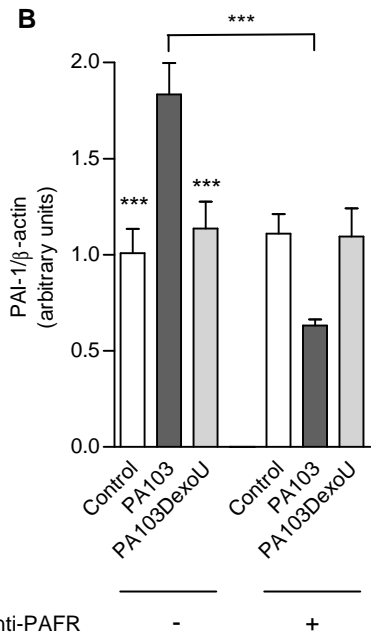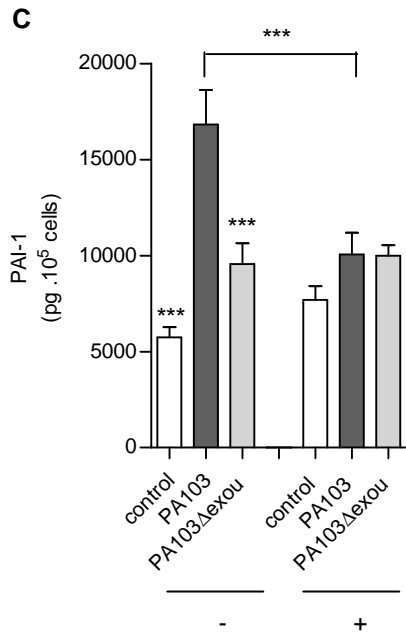

Supplement: MOESM9 [file 9425382]
